# Supplementary material for: Mass Spectrometry Imaging Disclosed Spatial Distribution of Defense-Related Metabolites in Triticum spp
Source: MDPI journal article supplement (doi:10.3390/metabo12010048), 2022-01-07
Supplement: s1 [file s1]

Supplementary Information for

# Mass Spectrometry Imaging Disclosed Spatial Distribution of Defense-Related Metabolites in *Triticum* spp.

Laura Righetti <sup>1,2,\*</sup>, Sven Gottwald <sup>1</sup>, Sara Tortorella <sup>3</sup>, Bernhard Spengler <sup>1</sup> and Dhaka Ram Bhandari <sup>1,4,\*</sup>

<sup>1</sup> Institute of Inorganic and Analytical Chemistry, Justus Liebig University Giessen, Heinrich-Buff-Ring 17, 35392 Giessen, Germany; sv.gottwald@t-online.de (S.G.); bernhard.spengler@anorg.chemie.uni-giessen.de (B.S.)

<sup>2</sup> Food and Drug Department, University of Parma, Viale delle Scienze 17/A, 43124 Parma, Italy

<sup>3</sup> Molecular Horizon Srl., Via Montelino 30, Bettona, 06084 Perugia, Italy; sara@molhorizon.it

<sup>4</sup> Gandaki Province Academy of Science and Technology, Pokhara 33700, Nepal

\* Correspondence: laura.righetti@unipr.it (L.R.); dhaka.r.bhandari@transmit.de (D.R.B.)

**Table S1.** List of metabolites imaged in common and durum wheat and differentially accumulated in non-infected vs infected kernels. The reference column gives cited references for metabolites detected in previous studies on wheat or other plants. The citation details are provided in the reference list.

| Subclass                   | Putative identification                            | Formula                                         | Adduct                              | Detected <i>m/z</i> | Infected kernel        | Non-infected kernel | Ref |
|----------------------------|----------------------------------------------------|-------------------------------------------------|-------------------------------------|---------------------|------------------------|---------------------|-----|
| N-acyl amines              | Hydroxyhexadecadienoylcarnitine                    | C <sub>23</sub> H <sub>41</sub> NO <sub>5</sub> | [M+H] <sup>+</sup>                  | 412.3057            | Endosperm and aleurone | N.D.                | [1] |
|                            | Hydroxy-hexadecenoylcarnitine                      | C <sub>23</sub> H <sub>43</sub> NO <sub>5</sub> | [M+H] <sup>+</sup>                  | 414.3214            | Endosperm and aleurone | N.D.                | [1] |
|                            | Hexadecanedioic acid mono-carnitine ester          | C <sub>23</sub> H <sub>43</sub> NO <sub>6</sub> | [M+H] <sup>+</sup>                  | 430.3163            | Endosperm and aleurone | N.D.                | [1] |
| Unsaturated fatty acid     | Alpha-Linolenic acid                               | C <sub>18</sub> H <sub>30</sub> O <sub>2</sub>  | [M+H] <sup>+</sup>                  | 279.2318            | Endosperm              | N.D.                | [2] |
|                            | 12,13-EOTrE                                        | C <sub>18</sub> H <sub>28</sub> O <sub>3</sub>  | [M+H] <sup>+</sup>                  | 293.2111            | Endosperm              | N.D.                | [3] |
|                            | Linoleic acid                                      | C <sub>18</sub> H <sub>32</sub> O <sub>2</sub>  | [M+K] <sup>+</sup>                  | 319.2033            | Endosperm              | N.D.                | [2] |
|                            | 13-HOME                                            | C <sub>18</sub> H <sub>34</sub> O <sub>3</sub>  | [M+Na] <sup>+</sup>                 | 321.2400            | Endosperm              | N.D.                | [4] |
|                            | 13-OxoODE                                          | C <sub>18</sub> H <sub>30</sub> O <sub>3</sub>  | [M+K] <sup>+</sup>                  | 333.1826            | Endosperm              | N.D.                | [3] |
|                            | 13-HODE                                            | C <sub>18</sub> H <sub>32</sub> O <sub>3</sub>  | [M+K] <sup>+</sup>                  | 335.1983            | Endosperm              | N.D.                | [4] |
|                            | 13-HpOTrE                                          | C <sub>18</sub> H <sub>30</sub> O <sub>4</sub>  | [M+K] <sup>+</sup>                  | 349.1775            | Endosperm              | N.D.                | [5] |
|                            | 13-HpODE/ 12,13-DiHODE                             | C <sub>18</sub> H <sub>32</sub> O <sub>4</sub>  | [M+K] <sup>+</sup>                  | 351.1932            | Endosperm              | N.D.                | [3] |
|                            | 12,13-diHOME                                       | C <sub>18</sub> H <sub>34</sub> O <sub>4</sub>  | [M+K] <sup>+</sup>                  | 353.2088            | Endosperm              | N.D.                | [5] |
|                            | 2-HpOTrE                                           | C <sub>18</sub> H <sub>30</sub> O <sub>5</sub>  | [M+K] <sup>+</sup>                  | 365.1724            | Endosperm              | N.D.                |     |
|                            | TriHODE/ 9,10-Dihydroxy-8-oxo-12-octadecenoic acid | C <sub>18</sub> H <sub>32</sub> O <sub>5</sub>  | [M+K] <sup>+</sup>                  | 367.1881            | Endosperm              | N.D.                | [5] |
|                            | TriHOME                                            | C <sub>18</sub> H <sub>34</sub> O <sub>5</sub>  | [M+K] <sup>+</sup>                  | 369.2037            | Endosperm              | N.D.                | [5] |
| Sterol                     | ergosterol                                         | C <sub>28</sub> H <sub>44</sub> O               | [M+H-H <sub>2</sub> O] <sup>+</sup> | 379.3359            | Endosperm              | N.D.                | [6] |
|                            |                                                    |                                                 | [M+H] <sup>+</sup>                  | 397.3465            | Endosperm              | N.D.                | [6] |
| Vitamin D3 and derivatives | Hydroxy-oxo-hexanorvitamin D3                      | C <sub>21</sub> H <sub>30</sub> O <sub>3</sub>  | [M+Na] <sup>+</sup>                 | 353.2087            | Endosperm              | N.D.                | [7] |
|                            | Dihydroxy-oxo-hexanorvitamin D3                    | C <sub>21</sub> H <sub>30</sub> O <sub>4</sub>  | [M+Na] <sup>+</sup>                 | 369.2036            | Endosperm              | N.D.                | [7] |
|                            | Vitamin D3/7-Dehydrocholesterol                    | C <sub>27</sub> H <sub>44</sub> O               | [M+K] <sup>+</sup>                  | 423.3023            | Endosperm              | N.D.                | [7] |
|                            | Dihydroxy-epivitamin D3                            | C <sub>27</sub> H <sub>44</sub> O <sub>3</sub>  | [M+K] <sup>+</sup>                  | 455.2922            | Endosperm              | N.D.                | [7] |
|                            | Trihydroxyvitamin D3                               | C <sub>27</sub> H <sub>44</sub> O <sub>4</sub>  | [M+K] <sup>+</sup>                  | 471.2871            | Endosperm              | N.D.                | [7] |

|                                           |                                                              |                                                               |                     |          |                        |                        |      |
|-------------------------------------------|--------------------------------------------------------------|---------------------------------------------------------------|---------------------|----------|------------------------|------------------------|------|
|                                           | Tetrahydroxyvitamin D3                                       | C <sub>27</sub> H <sub>44</sub> O <sub>5</sub>                | [M+K] <sup>+</sup>  | 487.2820 | Endosperm              | N.D.                   | [7]  |
|                                           | Dihydroxyl-didehydro-trihomovitamin D3                       | C <sub>30</sub> H <sub>48</sub> O <sub>3</sub>                | [M+K] <sup>+</sup>  | 495.3235 | Endosperm              | N.D.                   | [7]  |
|                                           | Diethyl-dihydroxyl-didehydro-oxavitamin D3                   | C <sub>30</sub> H <sub>48</sub> O <sub>4</sub>                | [M+K] <sup>+</sup>  | 511.3184 | Endosperm              | N.D.                   | [7]  |
| Carbohydrates and carbohydrate conjugates | Tetra-hexose                                                 | C <sub>24</sub> H <sub>40</sub> O <sub>20</sub>               | [M+K] <sup>+</sup>  | 687.1744 | Endosperm              | N.D.                   | [8]  |
|                                           | Apiosylglucosyl hydroxybenzoate                              | C <sub>18</sub> H <sub>24</sub> O <sub>12</sub>               | [M+Na] <sup>+</sup> | 455.1160 | Endosperm              | N.D.                   | [8]  |
| Triterpenoids                             | Feruloylcorosolic acid                                       | C <sub>40</sub> H <sub>56</sub> O <sub>7</sub>                | [M+H] <sup>+</sup>  | 649.4099 | Pericarp and testa     | N.D.                   |      |
|                                           | Gibbeellin glucosyl ester                                    | C <sub>25</sub> H <sub>34</sub> O <sub>11</sub>               | [M+H] <sup>+</sup>  | 511.2174 | Pericarp and testa     | N.D.                   |      |
|                                           | Methyl-apocarotenoate                                        | C <sub>33</sub> H <sub>44</sub> O <sub>2</sub>                | [M+Na] <sup>+</sup> | 495.3233 | Endosperm and aleurone | N.D.                   |      |
| Phenolic glycosides                       | Flavonoid glycoside                                          | C <sub>34</sub> H <sub>40</sub> O <sub>22</sub>               | [M+Na] <sup>+</sup> | 823.1903 | Endosperm              | N.D.                   | [9]  |
|                                           | Kaempferol rhamnoside                                        | C <sub>35</sub> H <sub>42</sub> O <sub>20</sub>               | [M+K] <sup>+</sup>  | 821.1901 | Pericarp               | N.D.                   |      |
|                                           | Methyl liquiritigenin rhamnoside                             | C <sub>22</sub> H <sub>24</sub> O <sub>8</sub>                | [M+H] <sup>+</sup>  | 417.1544 | Pericarp               | N.D.                   |      |
| Quinone and hydroquinone lipids           | Vit D2 hydroquinone                                          | C <sub>21</sub> H <sub>26</sub> O <sub>2</sub>                | [M+Na] <sup>+</sup> | 333.1825 | Endosperm              | N.D.                   |      |
| Purine 2'-deoxyribonucleosides            | Hydroxy-deoxyguanosine                                       | C <sub>10</sub> H <sub>13</sub> N <sub>5</sub> O <sub>5</sub> | [M+K] <sup>+</sup>  | 322.0548 | Endosperm              | N.D.                   | [10] |
| Carbonyl compounds                        | Falcarindione                                                | C <sub>17</sub> H <sub>20</sub> O <sub>2</sub>                | [M+H] <sup>+</sup>  | 257.1536 | Pericarp and VB        | N.D.                   | [11] |
| Simple Glc series                         | GlcCer (d14:1/20:0(OH))                                      | C <sub>40</sub> H <sub>77</sub> NO <sub>9</sub>               | [M+K] <sup>+</sup>  | 754.5230 | Endosperm              | N.D.                   | [5]  |
| Glycerophosphates                         | PA (42:8)                                                    | C <sub>45</sub> H <sub>73</sub> O <sub>8</sub> P              | [M+K] <sup>+</sup>  | 811.4674 | Pericarp               | N.D.                   |      |
| Diacylglycerols                           | DG (36:8)                                                    | C <sub>39</sub> H <sub>60</sub> O <sub>5</sub>                | [M+Na] <sup>+</sup> | 631.4333 | Pericarp               | N.D.                   | [4]  |
| Glycerophospholipids                      | PC(24:2) /PE-NMe(36:2)                                       | C <sub>42</sub> H <sub>80</sub> NO <sub>8</sub> P             | [M+H] <sup>+</sup>  | 758.5694 | N.D.                   | Endosperm              |      |
|                                           |                                                              |                                                               | [M+Na] <sup>+</sup> | 780.5513 | N.D.                   | Endosperm              |      |
|                                           | PC (24:1)/PE-NMe(36:1)<br>PE (20:4/P-18:1)                   | C <sub>42</sub> H <sub>82</sub> NO <sub>8</sub> P             | [M+H] <sup>+</sup>  | 760.5850 | N.D.                   | Endosperm              |      |
|                                           |                                                              |                                                               | [M+Na] <sup>+</sup> | 772.5251 | N.D.                   | Endosperm              |      |
|                                           | PC (32:0), PE(35:0), PE-NMe(34:0)<br>PC (26:4)/ PE-NMe(38:4) | C <sub>40</sub> H <sub>80</sub> NO <sub>8</sub> P             | [M+K] <sup>+</sup>  | 772.5253 | N.D.                   | Endosperm              |      |
|                                           |                                                              |                                                               | [M+H] <sup>+</sup>  | 782.5694 | N.D.                   | Endosperm              |      |
|                                           | PE (22:6/P-18:1)<br>PG (40:6)                                | C <sub>45</sub> H <sub>76</sub> NO <sub>7</sub> P             | [M+Na] <sup>+</sup> | 796.5251 | N.D.                   | Aleurone and endosperm |      |
|                                           |                                                              |                                                               | [M+H] <sup>+</sup>  | 823.5448 | N.D.                   | Aleurone               |      |
|                                           | PG (36:2)<br>PE (22:5/P-18:1)                                | C <sub>42</sub> H <sub>79</sub> O <sub>10</sub> P             | [M+Na] <sup>+</sup> | 797.5303 | N.D.                   | Endosperm              |      |
|                                           |                                                              |                                                               | [M+Na] <sup>+</sup> | 798.5408 | N.D.                   | Aleurone and endosperm |      |

|                   |                                                                                          |                                                    |                     |          |      |           |      |
|-------------------|------------------------------------------------------------------------------------------|----------------------------------------------------|---------------------|----------|------|-----------|------|
|                   | PS (46:7)                                                                                | C <sub>52</sub> H <sub>88</sub> NO <sub>10</sub> P | [M+K] <sup>+</sup>  | 956.5777 | N.D. | Endosperm |      |
|                   | LysoPC (16:0)                                                                            | C <sub>24</sub> H <sub>50</sub> NO <sub>7</sub> P  | [M+Na] <sup>+</sup> | 518.3217 | N.D. | Endosperm |      |
| Glycosylglycerols | MGDG (34:2)                                                                              | C <sub>43</sub> H <sub>78</sub> O <sub>10</sub>    | [M+K] <sup>+</sup>  | 793.5226 | N.D. | Endosperm | [12] |
|                   | DGDG (36:9)                                                                              | C <sub>51</sub> H <sub>78</sub> O <sub>15</sub>    | [M+K] <sup>+</sup>  | 795.5383 | N.D. | Endosperm | [12] |
|                   | MGDG (36:9)                                                                              | C <sub>45</sub> H <sub>68</sub> O <sub>10</sub>    | [M+K] <sup>+</sup>  | 796.5410 | N.D. | Endosperm | [12] |
|                   | Glycerol -(octadecadienoate) -<br>hexadecanoate-[galactopyranosyl-<br>galactopyranoside] | C <sub>49</sub> H <sub>88</sub> O <sub>15</sub>    | [M+Na] <sup>+</sup> | 939.6015 | N.D. | Endosperm |      |

- **Linoleic acid metabolism**

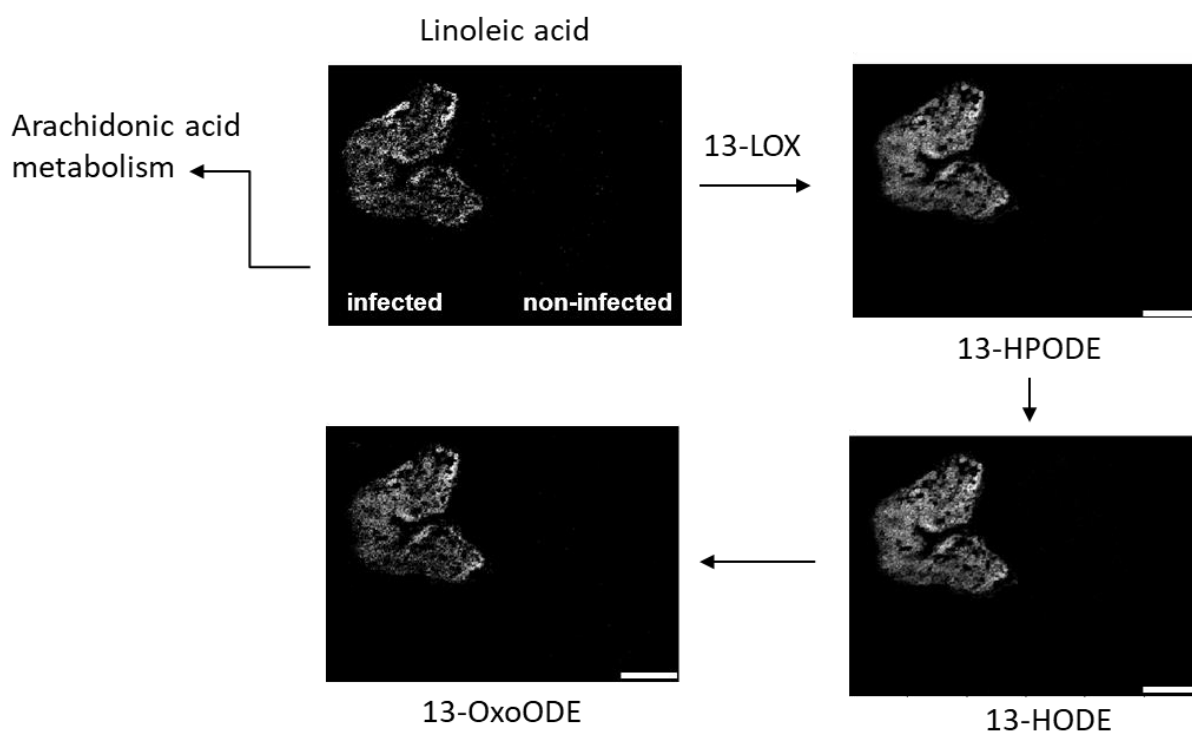

**Figure S1.** Spatial distribution of linoleic acid and oxylipins in common-wheat cross-sections: linoleic acid  $[\text{M}+\text{K}]^+ m/z$  319.2034, 13-HPODE  $[\text{M}+\text{K}]^+ m/z$  351.1932, 13-HODE  $[\text{M}+\text{K}]^+ m/z$  335.1983, 13-oxoODE  $[\text{M}+\text{K}]^+ m/z$  333.1826. MS images were generated with 300 x 220 pixels; 15  $\mu\text{m}$  pixel size;  $m/z$  bin width:  $\pm 5$  ppm; Scale bars: 400  $\mu\text{m}$ .

- **$\alpha$ -Linoleic acid metabolism**

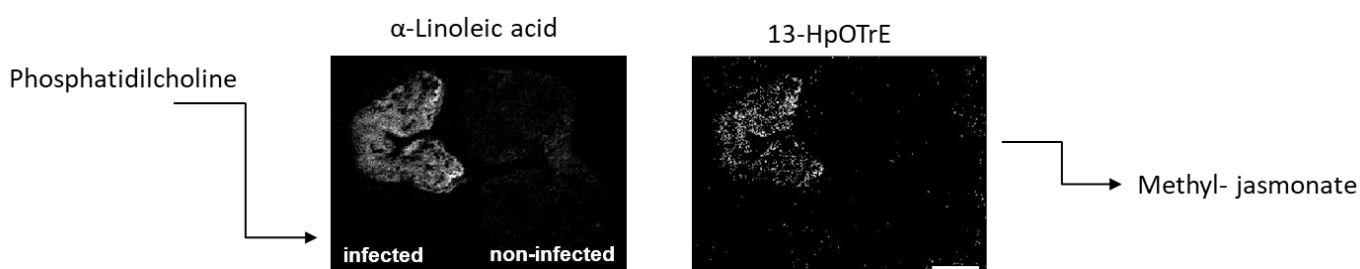

**Figure S2.** Spatial distribution of  $\alpha$ -linoleic acid  $[\text{M}+\text{H}]^+ m/z$  279.2318 and 13-HpOTrE  $[\text{M}+\text{K}]^+ m/z$  349.1775 in common-wheat cross-sections. MS images were generated with 300 x 220 pixels; 15  $\mu\text{m}$  pixel size;  $m/z$  bin width:  $\pm 5$  ppm;. Scale bars: 400  $\mu\text{m}$ .

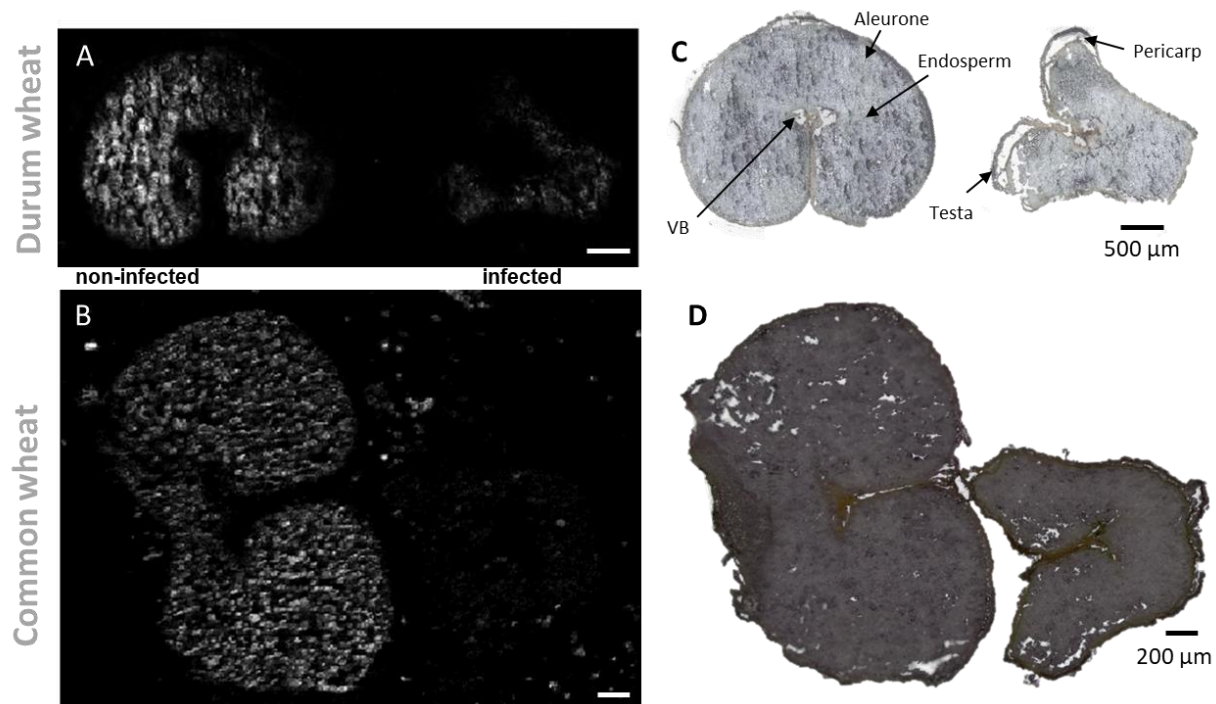

**Figure S3.** Spatial distribution of lyso-phosphatidylcholine in durum- (A) and common-wheat (B) cross-sections. LysoPC (16:0)  $[M+Na]^+$   $m/z$  518.3216 was found accumulated mainly in the endosperm of the non-infected seed. Optical image of durum- (C) and common-wheat (D) seed section with major morphological features labeled.

MS images were generated with (A) 336 x 138 pixels; 20 µm pixel size;  $m/z$  bin width:  $\pm 5$  ppm; scale bars: 500 µm; (B) 300 x 220 pixels; 15 µm pixel size;  $m/z$  bin width:  $\pm 5$  ppm; scale bars: 200 µm.

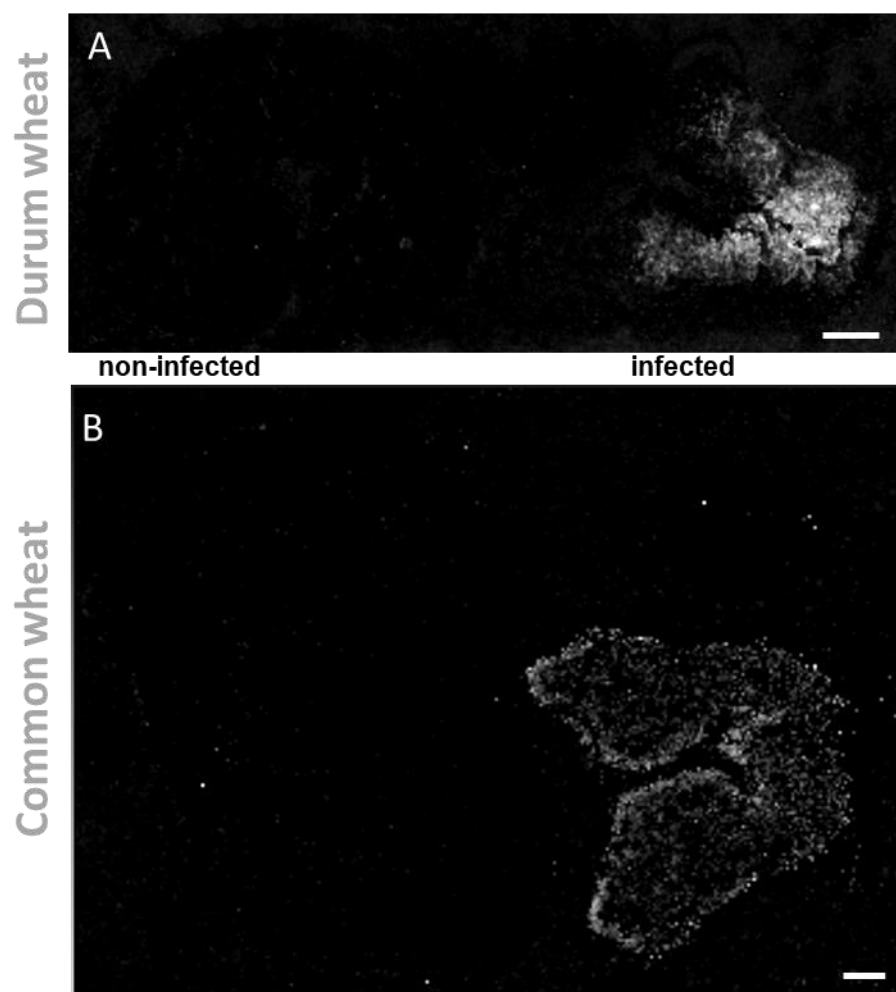

**Figure S4.** Spatial distribution of carbohydrates in durum- (A) and common-wheat (B) cross-sections. Trisaccharide  $[M+K]^+$   $m/z$  513.1222 was found accumulated exclusively in the infected seed. MS images were generated with (A) 336 x 138 pixels; 20  $\mu\text{m}$  pixel size;  $m/z$  bin width:  $\pm 5$  ppm; scale bars: 500  $\mu\text{m}$ ; (B) 300 x 220 pixels; 15  $\mu\text{m}$  pixel size;  $m/z$  bin width:  $\pm 5$  ppm; scale bars: 200  $\mu\text{m}$ .

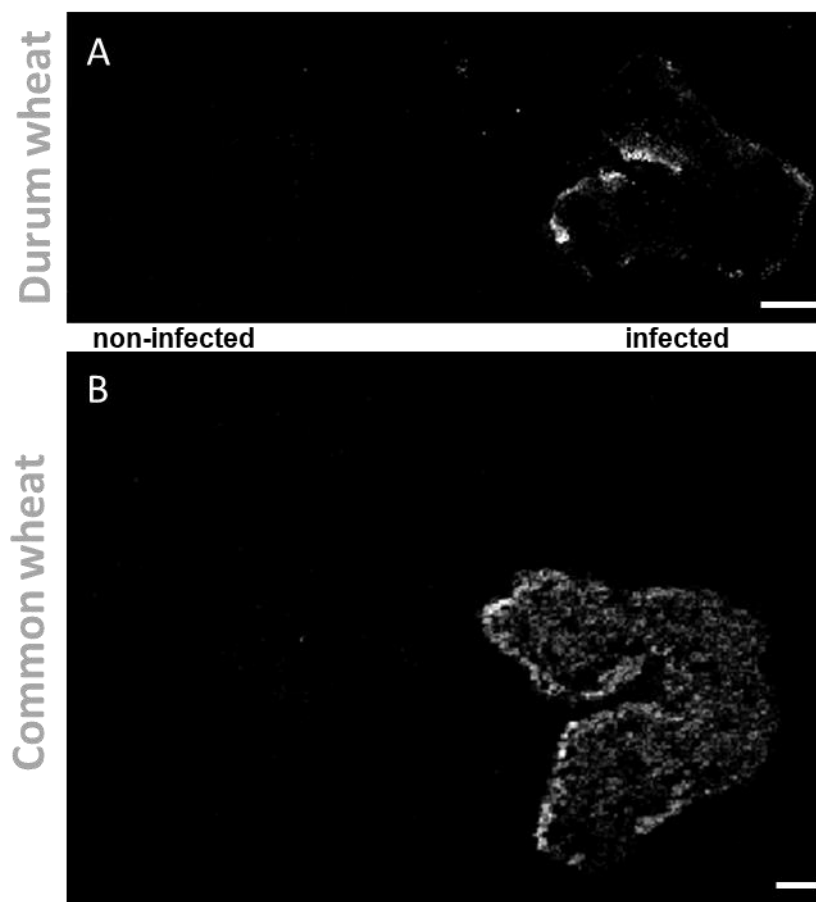

**Figure S5.** Spatial distribution of N-acyl amines in durum- (A) and common-wheat (B) cross-sections. Hydroxy-hexadecadienoylcarnitine  $[M+H]^+$   $m/z$  412.3057 was found accumulated exclusively in the infected seed.

MS images were generated with (A) 336 x 138 pixels; 20  $\mu\text{m}$  pixel size;  $m/z$  bin width:  $\pm 5$  ppm; scale bars: 500  $\mu\text{m}$ ; (B) 300 x 220 pixels; 15  $\mu\text{m}$  pixel size;  $m/z$  bin width:  $\pm 5$  ppm; scale bars: 200  $\mu\text{m}$ .



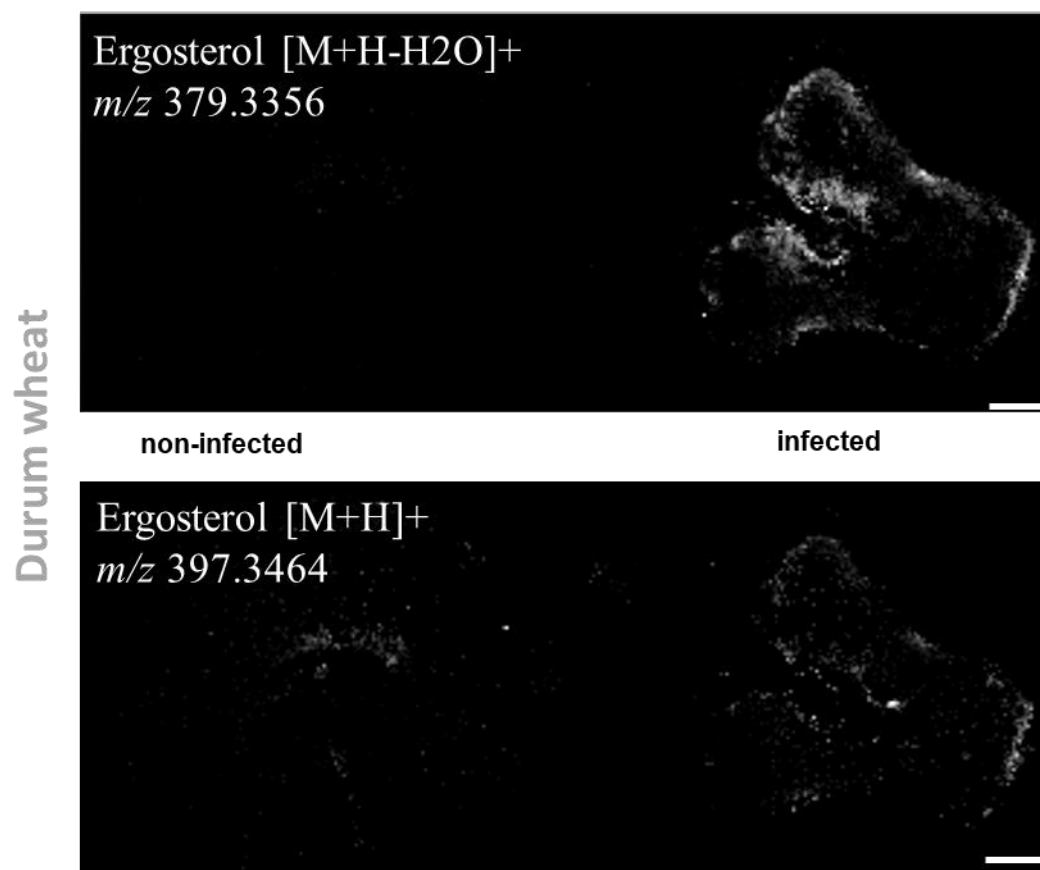

**Figure S6.** Spatial distribution of ergosterol in durum-wheat cross-sections. The [M+H]<sup>+</sup> image was normalized to the total ion count on a 0-60% intensity scale. MS images were generated with 336 x 138 pixels; 20  $\mu\text{m}$  pixel size; *m/z* bin width:  $\pm 5$  ppm; scale bars: 500  $\mu\text{m}$ .

## References

1. Bhandari, D.R.; Wang, Q.; Friedt, W.; Spengler, B.; Gottwald, S.; Römpf, A. High resolution mass spectrometry imaging of plant tissues: towards a plant metabolite atlas. *Analyst* **2015**, *140*, 7696–7709, doi:10.1039/C5AN01065A.
2. Righetti, L.; Lucini, L.; Giorni, P.; Locatelli, S.; Dall'Asta, C.; Battilani, P. Lipids as Key Markers in Maize Response to Fumonisin Accumulation. *J. Agric. Food Chem.* **2019**, *67*, 4064–4070, doi:10.1021/acs.jafc.8b06316.
3. Tsitsigiannis, D.I.; Keller, N.P. Oxylipins as developmental and host-fungal communication signals. *Trends Microbiol.* **2007**, *15*.
4. Rubert, J.; Righetti, L.; Stranska-Zachariasova, M.; Dzuman, Z.; Chrpova, J.; Dall'Asta, C.; Hajslova, J. Untargeted metabolomics based on ultra-high-performance liquid chromatography–high-resolution mass spectrometry merged with chemometrics: A new predictable tool for an early detection of mycotoxins. *Food Chem.* **2017**, *224*, 423–431, doi:10.1016/j.foodchem.2016.11.132.
5. Scala, V.; Giorni, P.; Cirlini, M.; Ludovici, M.; Visentin, I.; Cardinale, F.; Fabbri, A.A.; Fanelli, C.; Reverberi, M.; Battilani, P.; et al. LDS1-produced oxylipins are negative regulators of growth, conidiation and fumonisin synthesis in the fungal maize pathogen *Fusarium verticillioides*. *Front. Microbiol.* **2014**, *5*, doi:10.3389/fmicb.2014.00669.
6. Varga, M.; Bartók, T.; Mesterházy, Á. Determination of ergosterol in *Fusarium*-infected wheat by liquid chromatography-atmospheric pressure photoionization mass spectrometry. *J. Chromatogr. A* **2006**, *1103*, doi:10.1016/j.chroma.2005.11.051.
7. Jäpelt, R.B.; Jakobsen, J. Vitamin D in plants: A review of occurrence, analysis, and biosynthesis. *Front. Plant Sci.* **2013**, *4*.
8. Gauthier, L.; Atanasova-Penichon, V.; Chéreau, S.; Richard-Forget, F. Metabolomics to Decipher the Chemical Defense of Cereals against *Fusarium graminearum* and Deoxynivalenol Accumulation. *OPEN ACCESS Int. J. Mol. Sci* **2015**, *16*, 16, doi:10.3390/ijms161024839.
9. Bhandari, D.R.; Wang, Q.; Li, B.; Friedt, W.; Römpf, A.; Spengler, B.; Gottwald, S. Histology-guided high-resolution AP-SMALDI mass spectrometry imaging of wheat-*Fusarium graminearum* interaction at the root–shoot junction. *Plant Methods* **2018**, *14*, 103, doi:10.1186/s13007-018-0368-6.
10. Floyd, R.A.; West, M.S.; Hogsett, W.E.; Tingey, D.T. Increased 8-Hydroxyguanine Content of Chloroplast DNA from Ozone-Treated Plants. *Plant Physiol.* **1989**, *91*, doi:10.1104/pp.91.2.644.
11. Perochon, A.; Benbow, H.R.; Ślęczka-Brady, K.; Malla, K.B.; Doohan, F.M. Analysis of the chromosomal clustering of *Fusarium*-responsive wheat genes uncovers new players in the defence against head blight disease. *Sci. Rep.* **2021**, *11*, doi:10.1038/s41598-021-86362-4.
12. Chetal, S.; Wagle, D.S.; Nainawatee, H.S. Glycolipid changes in wheat and barley chloroplast under water stress. *Plant Sci. Lett.* **1981**, *20*, doi:10.1016/0304-4211(81)90266-2.
